# Supplementary material for: Pan-Genotypic Hepatitis C Treatment with Glecaprevir and Pibrentasvir for 8 Weeks Resulted in Improved Cardiovascular and Metabolic Outcomes and Stable Renal Function: A Post-Hoc Analysis of Phase 3 Clinical Trials
Source: Springer Nature journal article supplement (doi:10.1007/s40121-018-0218-x), 2018-10-27

Supplementary Table 1: Summary of clinical trials:

| Clinical trial | Patients                                        | Genotype     | Treatment Arms                                                                                         |
|----------------|-------------------------------------------------|--------------|--------------------------------------------------------------------------------------------------------|
| Endurance-1    | 620, 1:1 randomization across arms A and B      | 1            | Arm A: G/P for 12 weeks<br>Arm B: G/P for 8 weeks                                                      |
| Endurance-2    | 291-321, 2:1 randomization across arms A and B  | 2            | Arm A: G/P for 12 weeks<br>Arm B: Placebo for 12 weeks                                                 |
| Endurance-3    | 460, 2:1:1 randomization across arms A, B and C | 3            | Arm A: G/P for 12 week<br>Arm B: Sofosbuvir co-administered with daclatasvir<br>Arm C: G/P for 8 weeks |
| Endurance-4    | 130                                             | 4,5 or 6     | Single arm of G/P for 12 weeks                                                                         |
| Expedition-1   | 175                                             | 1,2,4,5 or 6 | Single arm of G/P for 12 weeks                                                                         |
| Expedition-4   | 100, all with CKD stage 4 and 5                 | 1-6          | Single arm of G/P for 12 weeks                                                                         |

G/P: glecaprevir + pibrentasvir

CKD: chronic kidney disease



|                 |       |        |       |       |        |       |     |      |
|-----------------|-------|--------|-------|-------|--------|-------|-----|------|
| < 2             | 51.0% | 22.8%  | 50.1% | 8.3%  | 0.0%   | 46.4% | 51% | 27%  |
| ≥ 2             | 32.3% | 49.0%  | 32.1% | 75.0% | 84.6%  | 34.8% | 32% | 59%  |
| Missing         | 16.7% | 28.2%  | 17.7% | 16.7% | 15.4%  | 18.5% | 17% | 14%  |
| HCV History     |       |        |       |       |        |       |     |      |
| DAA experienced | 1.1%  | 2.7%   | 1.2%  | 2.1%  | 7.7%   | 1.6%  | 1%  | 0%   |
| Naïve-all       | 74.5% | 71.1%  | 74.6% | 62.5% | 69.2%  | 74.7% | 74% | 68%  |
| P/R experienced | 24.4% | 26.2%  | 24.2% | 35.4% | 23.1%  | 23.6% | 25% | 32%  |
| Treatment arm   |       |        |       |       |        |       |     |      |
| 12 weeks        | 67.2% | 67.8%  | 67.1% | 72.9% | 92.3%  | 68.0% | 67% | 68%  |
| 8 weeks         | 32.8% | 32.2%  | 32.9% | 27.1% | 7.7%   | 32.0% | 33% | 32%  |
| SVR12           |       |        |       |       |        |       |     |      |
| Yes             | 99.1% | 100.0% | 99.3% | 97.9% | 100.0% | 99.1% | 99% | 100% |
| No              | 0.9%  | 0.0%   | 0.7%  | 2.1%  | 0.0%   | 0.9%  | 1%  | 0%   |

Note: Includes patients with or without cirrhosis treated with G/P for 8 or 12 weeks across five Phase 3 clinical trials (ENDURANCE-1, ENDURANCE-2, ENDURANCE-3, ENDURANCE-4 and EXPEDITION-1).

Supplementary Table 3: Patient demographics of the all patients who received G/P treatment regimen by treatment naïve non cirrhotic status:

|                                     | CV           |           |                 |                    | Metabolic    |           |                 |                    | Renal        |           |                 |                    |
|-------------------------------------|--------------|-----------|-----------------|--------------------|--------------|-----------|-----------------|--------------------|--------------|-----------|-----------------|--------------------|
|                                     | Naïve, F0-F3 | Naïve, F4 | Experienced, F4 | Experienced, F0-F3 | Naïve, F0-F3 | Naïve, F4 | Experienced, F4 | Experienced, F0-F3 | Naïve, F0-F3 | Naïve, F4 | Experienced, F4 | Experienced, F0-F3 |
| N                                   | 1039         | 110       | 36              | 364                | 1045         | 110       | 36              | 366                | 1037         | 110       | 36              | 364                |
| Age (mean; years)                   | 49.4         | 60.0      | 60.4            | 54.1               | 49.5         | 59.9      | 60.4            | 54.1               | 49.4         | 60.0      | 60.4            | 54.1               |
| Gender - male                       | 49.6%        | 59.1%     | 69.4%           | 58.0%              | 49.6%        | 59.1%     | 69.4%           | 58.2%              | 49.6%        | 59.1%     | 69.4%           | 58.2%              |
| Race                                |              |           |                 |                    |              |           |                 |                    |              |           |                 |                    |
| White                               | 82.0%        | 80.9%     | 86.1%           | 75.3%              | 81.9%        | 80.9%     | 86.1%           | 75.1%              | 82.1%        | 80.9%     | 86.1%           | 75.3%              |
| Asian                               | 12.2%        | 8.2%      | 2.8%            | 20.1%              | 12.3%        | 8.2%      | 2.8%            | 20.2%              | 12.2%        | 8.2%      | 2.8%            | 20.1%              |
| Black or African American           | 3.5%         | 10.0%     | 11.1%           | 3.0%               | 3.4%         | 10.0%     | 11.1%           | 3.0%               | 3.5%         | 10.0%     | 11.1%           | 3.0%               |
| Others                              | 2.2%         | 0.9%      | 0.0%            | 1.1%               | 2.2%         | 0.9%      | 0.0%            | 1.1%               | 2.2%         | 0.9%      | 0.0%            | 1.1%               |
| Fibrosis                            |              |           |                 |                    |              |           |                 |                    |              |           |                 |                    |
| F0-F1                               | 84.6%        | 0.0%      | 0.0%            | 79.4%              | 84.6%        | 0.0%      | 0.0%            | 79.2%              | 84.6%        | 0.0%      | 0.0%            | 79.4%              |
| F2                                  | 6.3%         | 0.0%      | 0.0%            | 7.4%               | 6.2%         | 0.0%      | 0.0%            | 7.4%               | 6.3%         | 0.0%      | 0.0%            | 7.4%               |
| F3                                  | 9.1%         | 0.0%      | 0.0%            | 13.2%              | 9.2%         | 0.0%      | 0.0%            | 13.4%              | 9.2%         | 0.0%      | 0.0%            | 13.2%              |
| F4                                  | 0.0%         | 100.0%    | 100.0%          | 0.0%               | 0.0%         | 100.0%    | 100.0%          | 0.0%               | 0.0%         | 100.0%    | 100.0%          | 0.0%               |
| Genotype                            |              |           |                 |                    |              |           |                 |                    |              |           |                 |                    |
| 1                                   | 41.8%        | 60.0%     | 66.7%           | 73.6%              | 41.5%        | 60.0%     | 66.7%           | 73.5%              | 41.9%        | 60.0%     | 66.7%           | 73.6%              |
| 2                                   | 12.9%        | 21.8%     | 19.4%           | 15.7%              | 13.4%        | 21.8%     | 19.4%           | 15.8%              | 12.9%        | 21.8%     | 0.0%            | 15.7%              |
| 3                                   | 37.4%        | 0.0%      | 0.0%            | 0.0%               | 37.2%        | 0.0%      | 0.0%            | 0.0%               | 37.5%        | 0.0%      | 19.4%           | 0.0%               |
| Others (4,5,6)                      | 7.9%         | 18.2%     | 13.9%           | 10.7%              | 7.8%         | 18.2%     | 13.9%           | 10.7%              | 7.7%         | 18.2%     | 13.9%           | 10.7%              |
| BMI (>=30)                          | 15.5%        | 40.9%     | 50.0%           | 14.6%              | 15.6%        | 40.9%     | 50.0%           | 14.5%              | 15.4%        | 40.9%     | 50.0%           | 14.6%              |
| Prior diabetes history - Yes        | 3.6%         | 20.0%     | 22.2%           | 9.1%               | 3.6%         | 20.0%     | 22.2%           | 9.3%               | 3.5%         | 20.0%     | 22.2%           | 9.1%               |
| History of metabolic syndrome - Yes | 14.4%        | 37.3%     | 47.2%           | 18.4%              | 14.5%        | 37.3%     | 47.2%           | 18.6%              | 14.4%        | 37.3%     | 47.2%           | 18.4%              |
| Prior cardiovascular disease - Yes  | 22.6%        | 50.0%     | 69.4%           | 34.1%              | 22.7%        | 50.0%     | 69.4%           | 34.2%              | 22.6%        | 50.0%     | 69.4%           | 34.1%              |
| HOMA - IR                           |              |           |                 |                    |              |           |                 |                    |              |           |                 |                    |
| < 2                                 | 51.8%        | 21.8%     | 19.4%           | 48.9%              | 51.9%        | 21.8%     | 19.4%           | 49.2%              | 51.9%        | 21.8%     | 19.4%           | 48.9%              |

|                 |        |        |        |       |        |        |        |       |        |        |        |       |
|-----------------|--------|--------|--------|-------|--------|--------|--------|-------|--------|--------|--------|-------|
| ≥ 2             | 28.0%  | 63.6%  | 69.4%  | 38.5% | 28.0%  | 63.6%  | 69.4%  | 38.3% | 28.1%  | 63.6%  | 69.4%  | 38.5% |
| Missing         | 20.2%  | 14.5%  | 11.1%  | 42.9% | 20.1%  | 14.5%  | 11.1%  | 12.6% | 20.1%  | 14.5%  | 11.1%  | 12.6% |
| HCV History     |        |        |        |       |        |        |        |       |        |        |        |       |
| DAA experienced | 0.0%   | 0.0%   | 30.6%  | 2.5%  | 0.0%   | 0.0%   | 30.6%  | 2.5%  | 0.0%   | 0.0%   | 30.6%  | 2.5%  |
| Naïve-all       | 100.0% | 100.0% | 0.0%   | 0.0%  | 100.0% | 100.0% | 0.0%   | 0.0%  | 100.0% | 100.0% | 0.0%   | 0.0%  |
| P/R experienced | 0.0%   | 0.0%   | 69.4%  | 97.5% | 0.0%   | 0.0%   | 69.4%  | 97.5% | 0.0%   | 0.0%   | 69.4%  | 97.5% |
| Treatment arm   |        |        |        |       |        |        |        |       |        |        |        |       |
| 12 weeks        | 64.0%  | 100.0% | 100.0% | 64.0% | 64.2%  | 100.0% | 100.0% | 64.2% | 63.9%  | 100.0% | 100.0% | 64.0% |
| 8 weeks         | 36.0%  | 0.0%   | 0.0%   | 36.0% | 35.8%  | 0.0%   | 0.0%   | 35.8% | 36.1%  | 0.0%   | 0.0%   | 36.0% |
| SVR12           |        |        |        |       |        |        |        |       |        |        |        |       |
| Yes             | 99.0%  | 100.0% | 97.2%  | 99.7% | 99.0%  | 100.0% | 97.2%  | 99.7% | 99.0%  | 100.0% | 97.2%  | 99.7% |
| No              | 1.0%   | 0.0%   | 2.8%   | 0.3%  | 1.0%   | 0.0%   | 2.8%   | 0.3%  | 1.0%   | 0.0%   | 2.8%   | 0.3%  |

Note: Includes patients with or without cirrhosis treated with G/P for 8 or 12 weeks across five Phase 3 clinical trials (ENDURANCE-1, ENDURANCE-2, ENDURANCE-3, ENDURANCE-4 and EXPEDITION-1).

Supplementary Table 4: Impact of treatment with 8 week G/P on studied biomarkers by treatment history and cirrhotic status

|                                     | N   | Adjusted baseline | W1     | W2     | W4     | W8     | PTW4   |
|-------------------------------------|-----|-------------------|--------|--------|--------|--------|--------|
| Triglycerides                       |     |                   |        |        |        |        |        |
| <b>All 8 week treated patients</b>  | 505 | 165.8             | -13.7* | -15.2* | -17.8* | -17.8* | -5.5*  |
| <b>Naïve, F0 – F3</b>               | 374 | 166.3             | -11.2* | -14.3* | -19.3* | -17.7* | -2.2   |
| <b>P/R Experienced, F0 - F3</b>     | 131 | 153.8             | -29.4* | -26.6* | -22.0* | -26.9* | -24.2* |
| Glucose                             |     |                   |        |        |        |        |        |
| <b>All 8 weeks treated patients</b> | 505 | 129.9             | -2.6   | -3.3   | -3.2   | -11.1* | -13.4* |
| <b>Naïve, F0 - F3</b>               | 374 | 130.9             | -11.5* | -17.7* | -15.6* | -31.6* | -31.3* |
| <b>P/R Experienced, F0 - F3</b>     | 131 | 126.8             | -0.9   | 6.2    | 3.1    | 3.2    | -1.1   |
| eGFR                                |     |                   |        |        |        |        |        |
| <b>All 8 weeks treated patients</b> | 505 | 95.9              | 0.9    | 0.3    | 0.3    | -0.5   | -0.8   |
| <b>Naïve, F0 - F3</b>               | 374 | 98.1              | -1.3   | -1.8   | -1.4   | -2.5   | -2.8   |
| <b>P/R Experienced, F0 - F3</b>     | 131 | 92.3              | 2.7    | 2.1    | 1.1    | 1.1    | 0.7    |

\*indicate statistical significance at alpha = 0.05; BL: baseline; W: week; PTW4: Post treatment week 4; P/R: Peg-interferon + ribavirin

Supplementary Table 5a: Impact of treatment with G/P on triglycerides by treatment history and cirrhotic status and by baseline EHM level

|                           |          |                          | <b>Adjusted change from baseline</b> |           |           |            |             |
|---------------------------|----------|--------------------------|--------------------------------------|-----------|-----------|------------|-------------|
| <b>Normal</b>             |          |                          |                                      |           |           |            |             |
|                           | <b>N</b> | <b>Adjusted baseline</b> | <b>W1</b>                            | <b>W2</b> | <b>W4</b> | <b>EOT</b> | <b>PTW4</b> |
| <b>Naïve, F0-F3</b>       | 945      | 96.1                     | 12.6*                                | 10.6*     | 9.6*      | 8.7*       | 18.6*       |
| <b>Naïve, F4</b>          | 98       | 106.1                    | 20.8*                                | 12.3      | 11.3      | 13.9       | 20.2*       |
| <b>Experienced, F4</b>    | 25       | 112.6                    | 1.6                                  | 16.9      | 15.8      | 10.8       | 20.1        |
| <b>Experienced, F0-F3</b> | 332      | 99.9                     | 0.06                                 | 1.3       | -1.2      | -0.3       | 9.9         |
| <b>Elevated</b>           |          |                          |                                      |           |           |            |             |
| <b>Naïve, F0-F3</b>       | 94       | 194.7                    | -54.8*                               | -54.9*    | -39.3*    | -47.4*     | -36.1*      |
| <b>Naïve, F4</b>          | 12       | 195.3                    | -57.1*                               | -89.1*    | -92.8*    | -88.6*     | -96.7*      |
| <b>Experienced, F4</b>    | 11       | 202.5                    | -54.2*                               | -80.9*    | -9.4      | -70.2*     | -44.8*      |
| <b>Experienced, F0-F3</b> | 32       | 188.2                    | -41.4*                               | -46.9*    | -39.9*    | -47.3*     | -50.6*      |

\*indicate statistical significance at alpha = 0.05; BL: baseline; W: week; PTW4: Post treatment week 4

Supplementary Table 5b: Impact of treatment with G/P on glucose by treatment history and cirrhotic status and by baseline EHM level

|                           |          |                          |           | <b>Adjusted change from baseline</b> |             |             |             |
|---------------------------|----------|--------------------------|-----------|--------------------------------------|-------------|-------------|-------------|
| <b>Normal</b>             |          |                          |           |                                      |             |             |             |
|                           | <b>N</b> | <b>Adjusted baseline</b> | <b>W1</b> | <b>W2</b>                            | <b>W4</b>   | <b>EOT</b>  | <b>PTW4</b> |
| <b>Naïve, F0-F3</b>       | 1012     | 93.9                     | 5.1*      | 4.6*                                 | 4.1*        | 4.5*        | 5.1*        |
| <b>Naïve, F4</b>          | 97       | 104.5                    | 6.7       | 4.7                                  | 1.9         | 2.6         | 2.3         |
| <b>Experienced, F4</b>    | 32       | 103.1                    | 4.2       | -1.9                                 | -1.4        | -3.7        | -1.1        |
| <b>Experienced, F0-F3</b> | 346      | 95.7                     | 0.7       | 1.6                                  | 0.9         | 0.9         | 0.9         |
| <b>Pre-diabetic</b>       |          |                          |           |                                      |             |             |             |
| <b>Naïve, F0-F3</b>       | 21       | 137.1                    | -12.9*    | -6.3*                                | -15.1*      | -30.1*      | -39.7*      |
| <b>Naïve, F4</b>          | 8        | 139.6                    | -23.7     | -35.7*                               | -30.9*      | -45.5*      | -33.9*      |
| <b>Experienced, F4</b>    | 2        | 134.1                    | -8.7      | -14.8                                | -28.8*      | -29.8*      | -21.8       |
| <b>Experienced, F0-F3</b> | 15       | 152.8                    | -3.6      | -1.3                                 | -8.6*       | -8.1*       | -21.2*      |
| <b>Diabetic</b>           |          |                          |           |                                      |             |             |             |
| <b>Naïve, F0-F3</b>       | 4        | 205.4                    | 12.9      | -34.4*                               | -1.9        | -80.6*      | -93.5*      |
| <b>Naïve, F4</b>          | 5        | 232.2                    | -101.5*   | -100.5*                              | -<br>111.7* | -<br>146.2* | -71.3*      |
| <b>Experienced, F4</b>    | 2        | 179.1                    | -11.1     | -65.3*                               | -<br>107.4* | -90.8*      | -77.5*      |
| <b>Experienced, F0-F3</b> | 2        | 182.6                    | -26.5*    | -18.6*                               | -42.1*      | -42.7*      | -50.9*      |

\*indicate statistical significance at alpha = 0.05; BL: baseline; W: week; PTW4: Post treatment week 4



Supplementary Table 5c: Impact of treatment with G/P on eGFR by treatment history and cirrhotic status and by baseline EHM level

|                           |          |                          |           | <b>Adjusted change from baseline</b> |           |            |             |
|---------------------------|----------|--------------------------|-----------|--------------------------------------|-----------|------------|-------------|
| <b>CKD Stage 1</b>        |          |                          |           |                                      |           |            |             |
|                           | <b>N</b> | <b>Adjusted baseline</b> | <b>W1</b> | <b>W2</b>                            | <b>W4</b> | <b>EOT</b> | <b>PTW4</b> |
| <b>Naïve, F0-F3</b>       | 529      | 102.4                    | -3.4*     | -2.8*                                | -3.2*     | -3.3*      | -4.3*       |
| <b>Naïve, F4</b>          | 59       | 104.8                    | -5.4*     | -1.3                                 | -5.9*     | -3.7       | -5.2*       |
| <b>Experienced, F4</b>    | 15       | 108.1                    | -8.8*     | -11.4*                               | -7.5      | -12.5*     | -7.1        |
| <b>Experienced, F0-F3</b> | 184      | 102.1                    | -5.3*     | -6.1*                                | -6.9*     | -9.4*      | -9.1*       |
| <b>CKD Stage 2</b>        |          |                          |           |                                      |           |            |             |
| <b>Naïve, F0-F3</b>       | 497      | 80.7                     | 2.4*      | 2.8*                                 | 2.9*      | 2.1*       | 2.3*        |
| <b>Naïve, F4</b>          | 47       | 77.6                     | 0.8       | 1.6                                  | 1.6       | 2.2        | 1.7         |
| <b>Experienced, F4</b>    | 18       | 76.2                     | -5.3      | -2.5                                 | -3.2      | -7.6       | -4.2        |
| <b>Experienced, F0-F3</b> | 176      | 80.6                     | 0.8       | 1.1                                  | -0.2      | -0.4       | 0.6         |
| <b>CKD Stage 3</b>        |          |                          |           |                                      |           |            |             |
| <b>Naïve, F0-F3</b>       | 11       | 61.4                     | 10.9*     | 12.2*                                | 10.1*     | 4.5        | 12.3*       |
| <b>Naïve, F4</b>          | 4        | 53.9                     | 0.7       | 7.2                                  | 7.4       | -1.1       | 4.2         |
| <b>Experienced, F4</b>    | 3        | 58.2                     | -8.1      | 2.1                                  | 1.6       | 3.6        | 3.3         |
| <b>Experienced, F0-F3</b> | 4        | 57.5                     | 6.1       | 3.8                                  | 4.1       | 6.8        | 7.3         |

\*indicate statistical significance at alpha = 0.05; BL: baseline; W: week; PTW4: Post treatment week 4

Supplementary Table 6: Descriptive mean change from baseline for various study populations

|                       | N    | Unadjusted baseline | Change from BL to EOT | Change from BL to PTW4 |
|-----------------------|------|---------------------|-----------------------|------------------------|
| Glucose               |      |                     |                       |                        |
| Overall - G/P treated | 1550 | 97.0                | -0.1                  | 0.6                    |
| Normal                | 1491 | 93.8                | 1.5*                  | 2.0*                   |
| Pre- diabetic         | 59   | 178.7               | -38.7*                | -36.2*                 |
| Diabetic              |      |                     |                       |                        |
| Triglycerides         |      |                     |                       |                        |
| Overall - G/P treated | 1553 | 103.6               | 1.0                   | 10.7*                  |
| Normal                | 1490 | 89.9                | 6.7*                  | 16.6*                  |
| Elevated              | 150  | 232.9               | -52.9*                | -45.5*                 |
| eGFR                  |      |                     |                       |                        |
| Overall - G/P treated | 1551 | 93.0                | -2.6*                 | -2.4*                  |
| Normal                | 788  | 106.8               | -5.5*                 | -5.9*                  |
| Stage 2 and stage 3   | 763  | 78.8                | 0.4                   | 1.2*                   |
| Stage 4 and 5         | 104  | 10.6                | -0.2                  | -0.16                  |

\*indicate statistical significance at alpha = 0.05; BL: baseline; W: week; PTW4: Post treatment week 4

Supplementary Figure 1: Predicted change in triglycerides from baseline: Overall all HCV patients treated with G/P

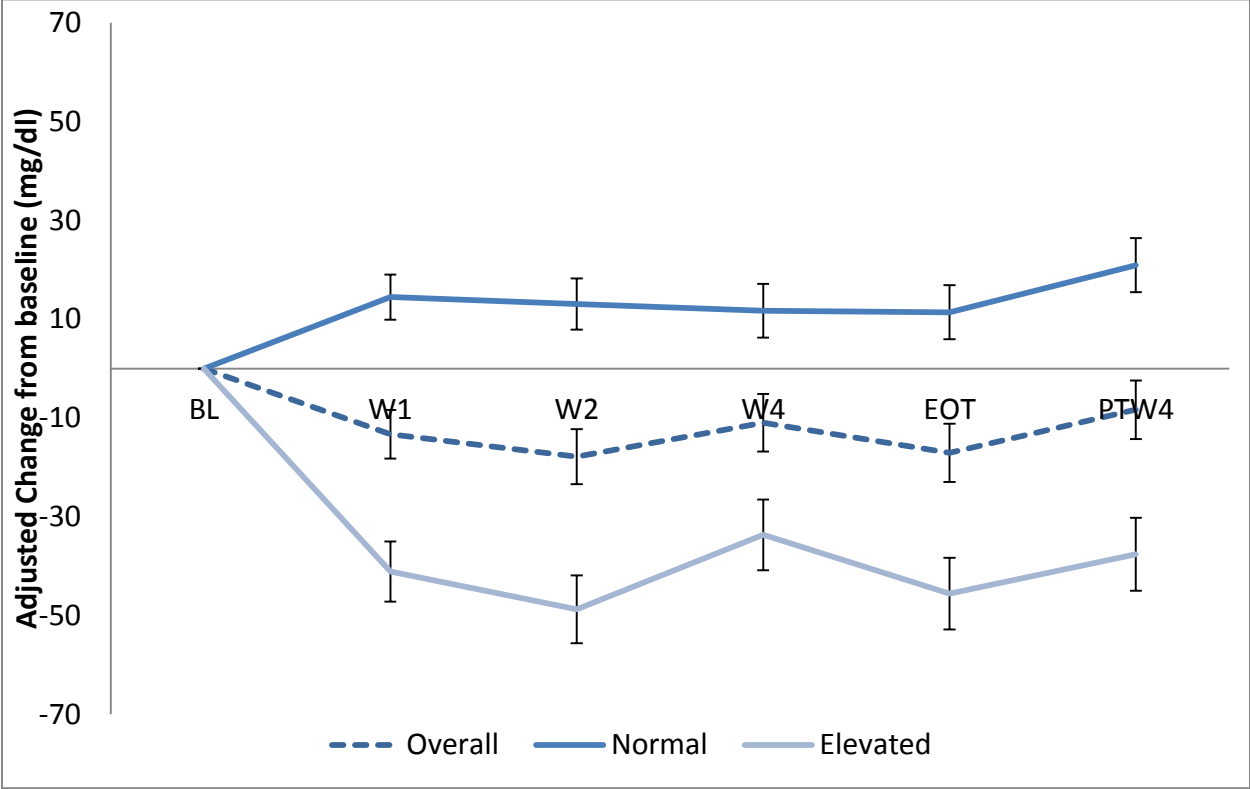

Supplementary Figure 2: Predicted change in glucose from baseline: Overall all HCV patients treated with G/P

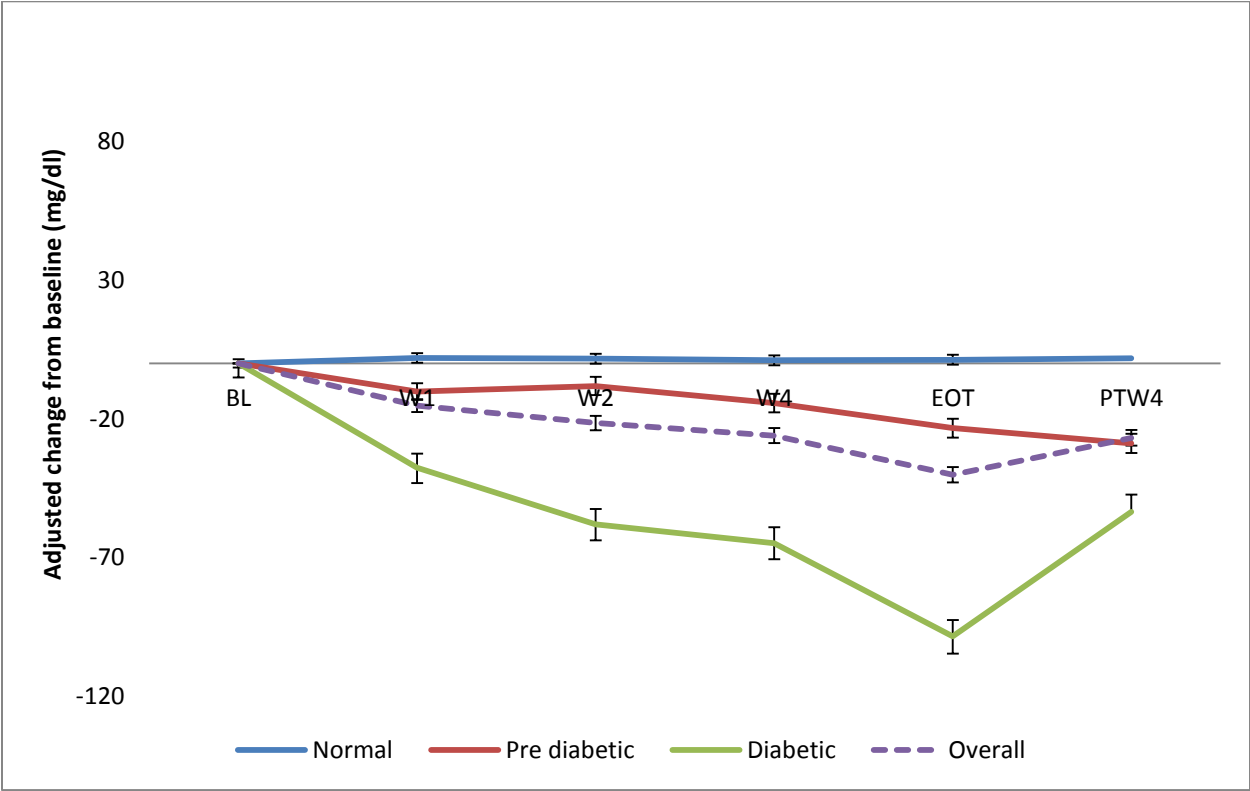

Supplementary Figure 3: Predicted change in eGFR from baseline: Overall all HCV patients treated with G/P

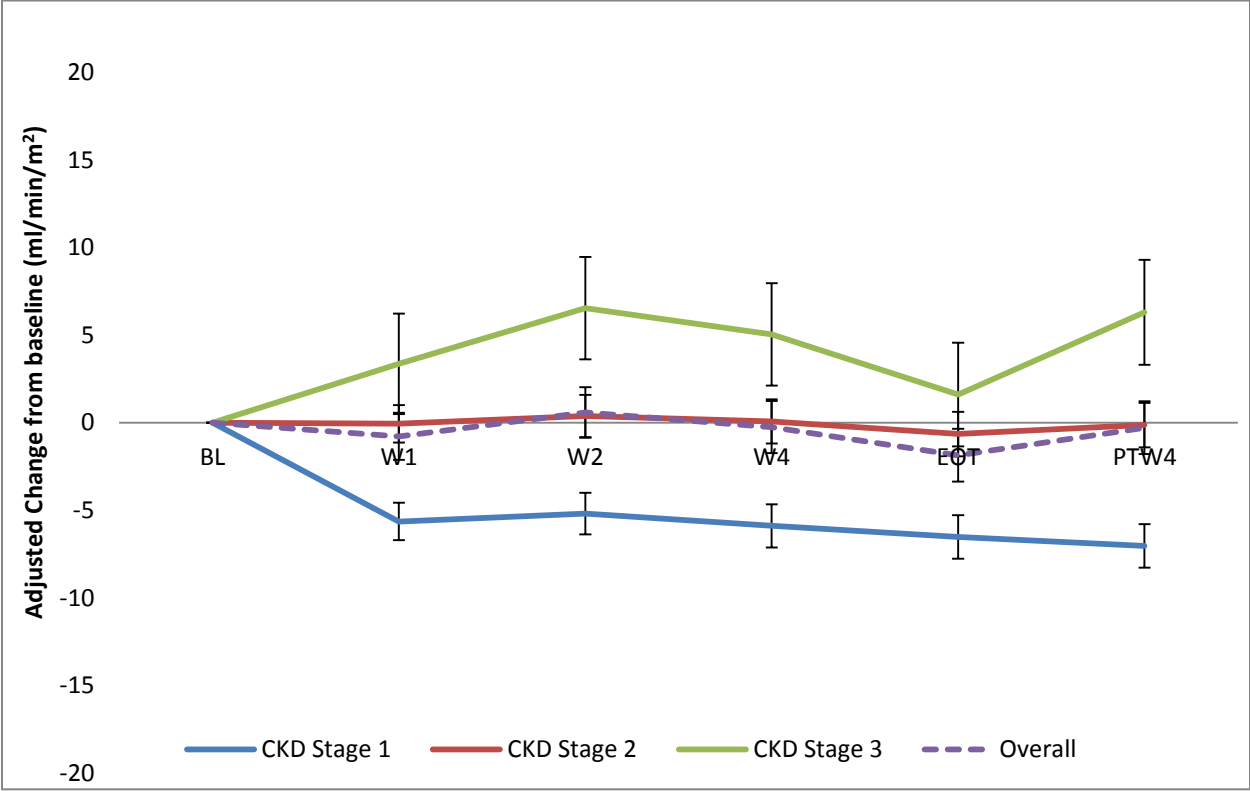

Supplement: MOESM1 [file 16230218]
